# Supplementary material for: Comparative Expression Analyses of Pro- versus Anti-Inflammatory Mediators within Synovium of Patients with Joint Trauma, Osteoarthritis, and Rheumatoid Arthritis
Source: Hindawi journal article supplement (doi:10.1155/2017/9243736), 2017-01-01

**Supplement Table 1**

| Antigen                   | Manufacturer, Species, Type, Catalogue Number                                                                                                         | DILUTION |
|---------------------------|-------------------------------------------------------------------------------------------------------------------------------------------------------|----------|
| COX-2                     | Abcam; Cambridge, UK Polyclonal Rabbit IgG Anti-human # ab6665                                                                                        | 1:400    |
| FPRL1                     | Abcam, Cambridge, UK Polyclonal Rabbit IgG Anti-human # ab101702                                                                                      | 1:200    |
| EP1, EP2, EP4, EP4        | A gift from Dr. R. Nüsing, Institute of clinical pharmacology, Johann Wolfgang Goethe University, Frankfurt, Germany Polyclonal Rabbit IgG Anti-human | 1:300    |
| COX-2                     | BD Transduction Laboratories; MD, USA Monoclonal Mouse IgM Anti-huma # Nr.610203;                                                                     | 1:300    |
| 15-LOX                    | Abnova, Taipei, Taiwan Monoclonal Mouse IgG2a Anti-human # 12080- 3D8                                                                                 | 1:100    |
| IL-1 $\beta$              | Santa Cruz Biotechnology, INC. USA polyclonal Goat IgG against human<br>#M-20; SC-1251                                                                | 1:200    |
| TNF $\alpha$              | Santa Cruz Biotechnology, INC. USA Polyclonal Goat IgG against human # C-20; SC-1347                                                                  | 1:100    |
| 5- LOX                    | Santa Cruz Biotechnology, INC. USA polyclonal Goat IgG against human # N-19; SC-8885                                                                  | 1:200    |
| CD15                      | Dako; Glostrup. Denmark Monoclonal Mouse IgM against human<br># Clone C3D-1; Nr. M0733                                                                | 1:200    |
| CD68                      | Dako; Glostrup. Denmark Monoclonal Mouse IgG against human # M 0814 clone KP1(macrophages)                                                            | 1:200    |
| Prolyl-4-Hydroxylase beta | Acris Antibodies, Inc., San Diego, CA, USA Monoclonal Mouse IgG1 against human # Clone 3-2B12                                                         | 1:400    |
| Plasma cell Ab-1          | Lab vision, CA, USA Monoclonal Mouse IgG2a against human # Clone LIV3G11                                                                              | 1:500    |

**A**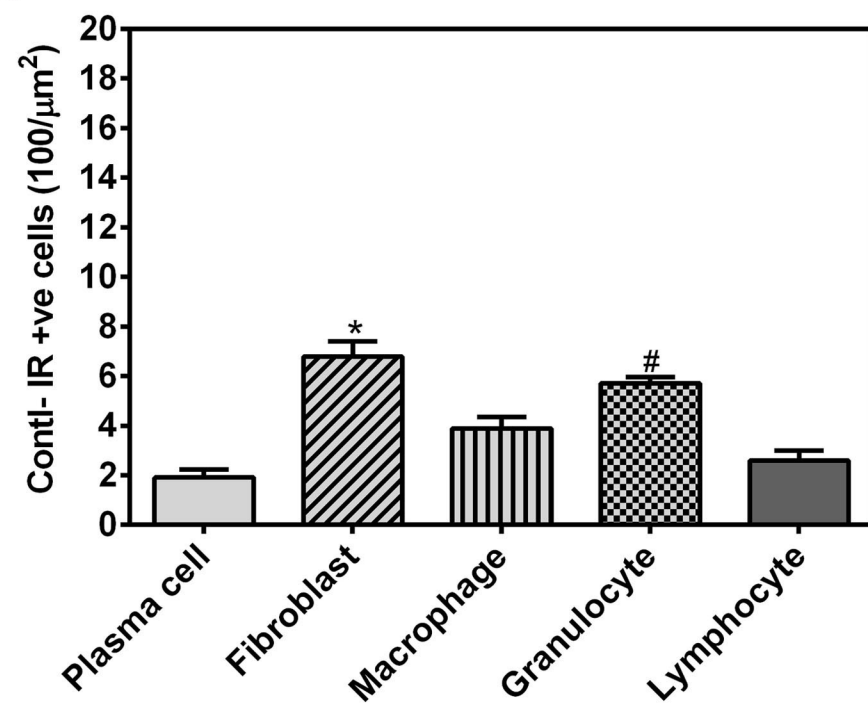**B**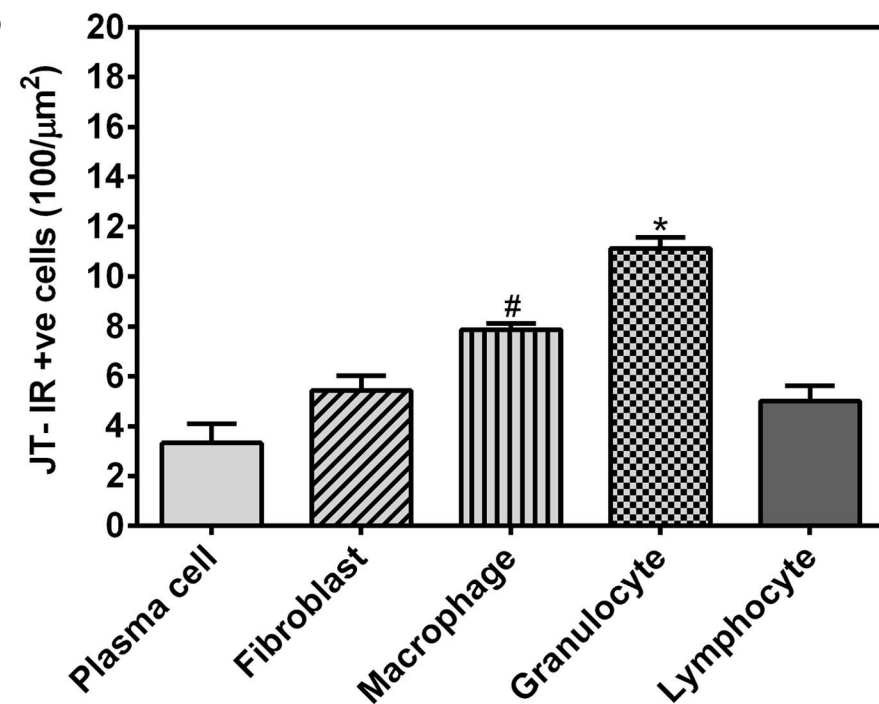**C**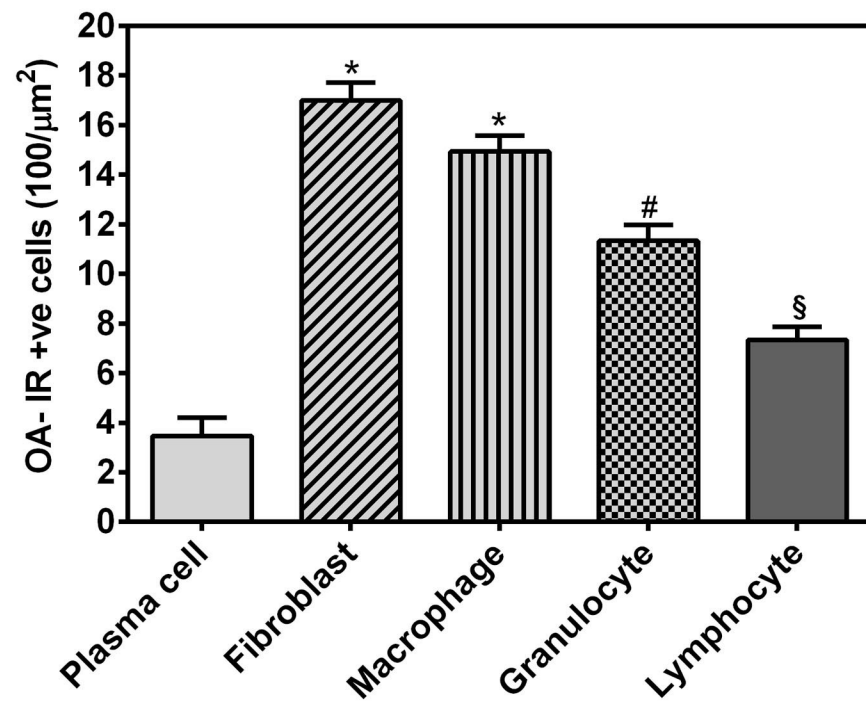**D**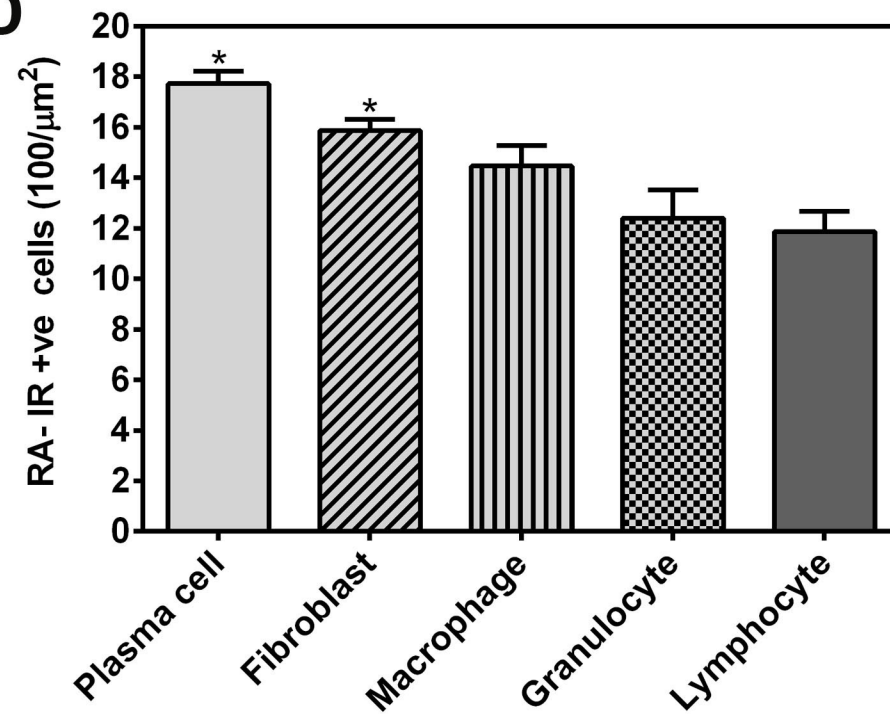

Supplement Figure 2

**A**

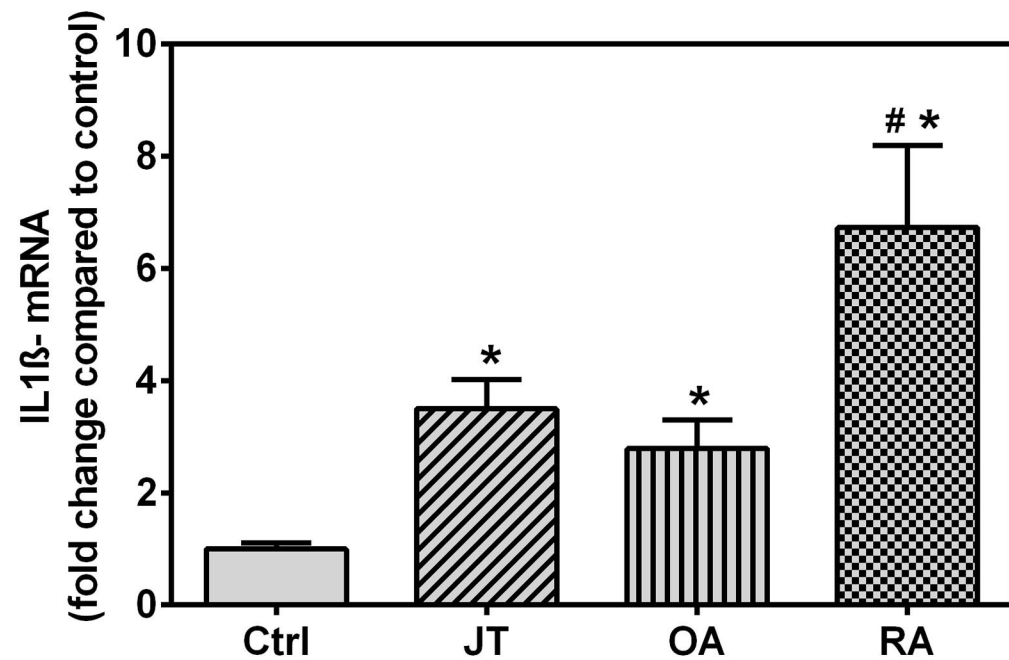

**B**

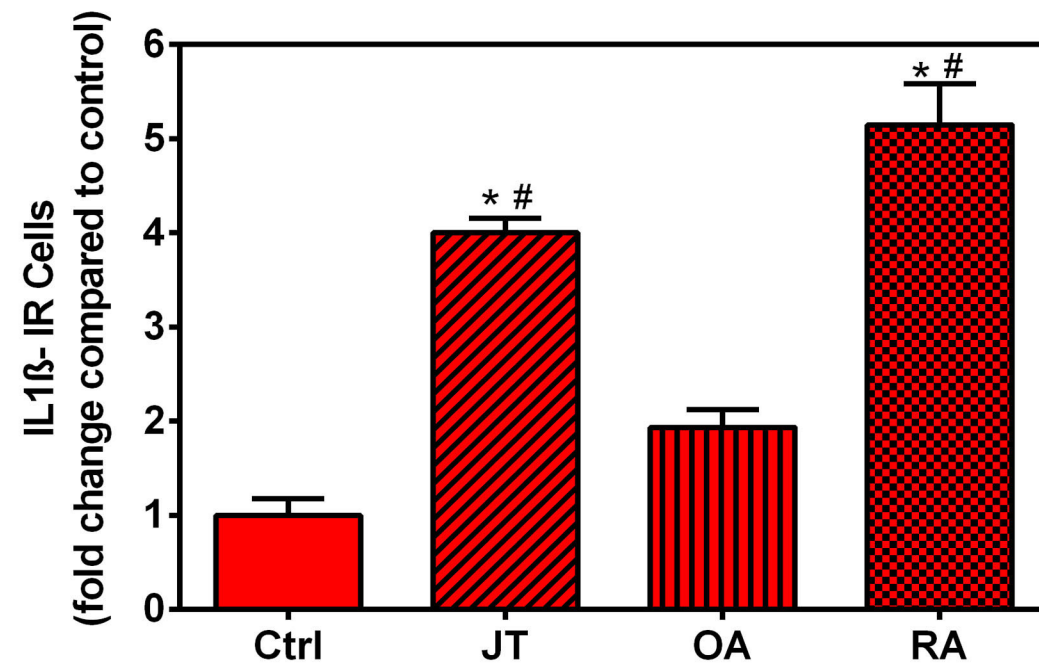

**C**

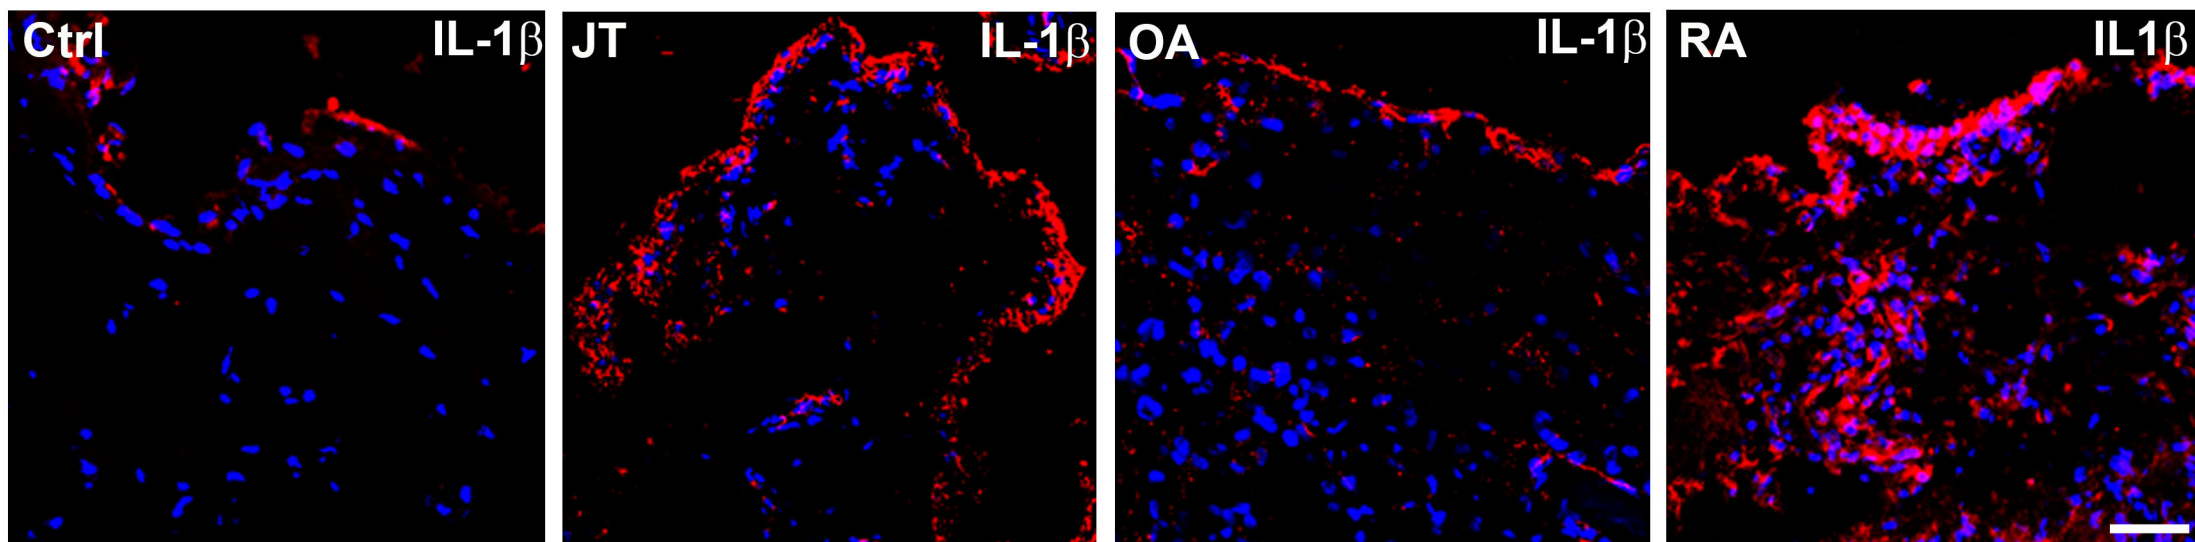

**A**

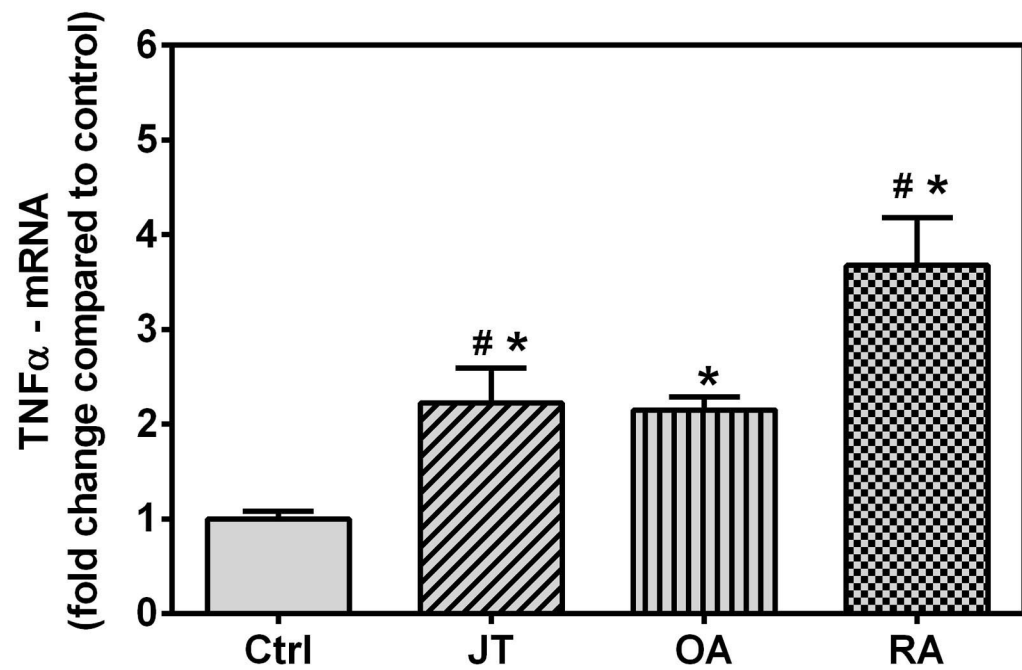

**B**

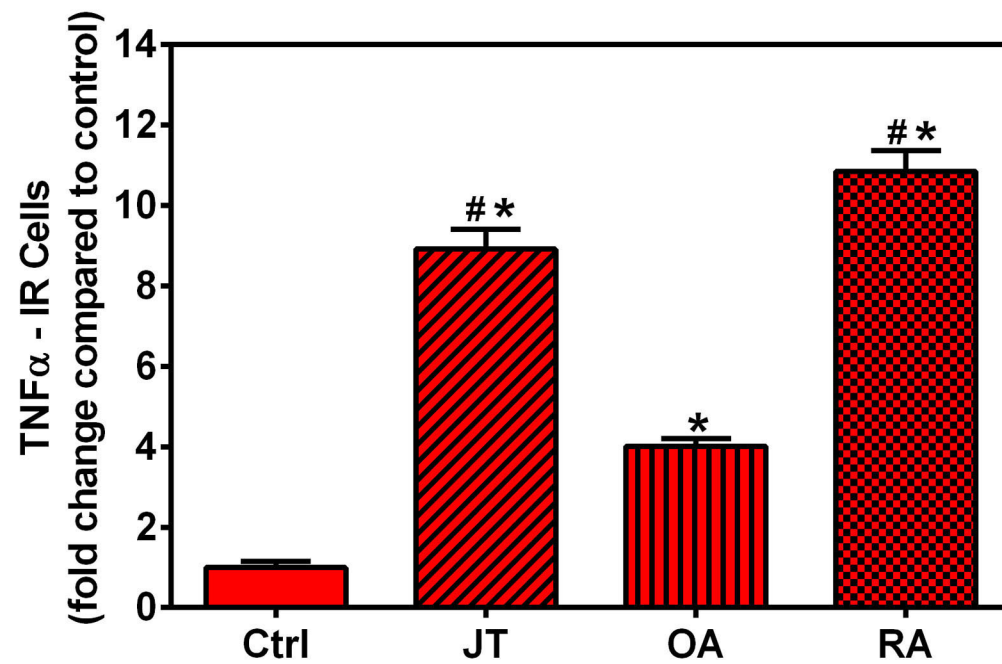

**C**

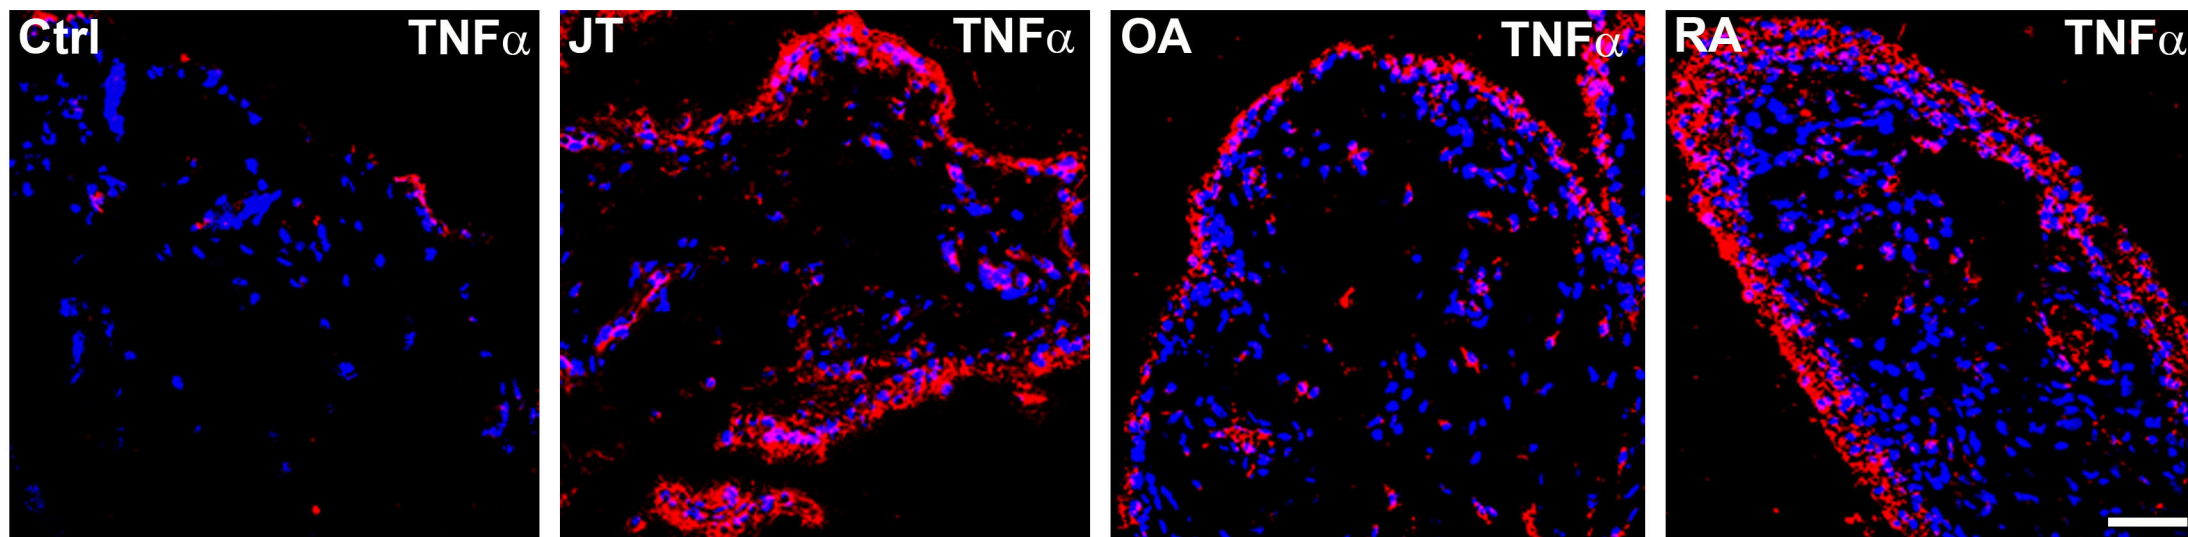



Supplement Figure 4

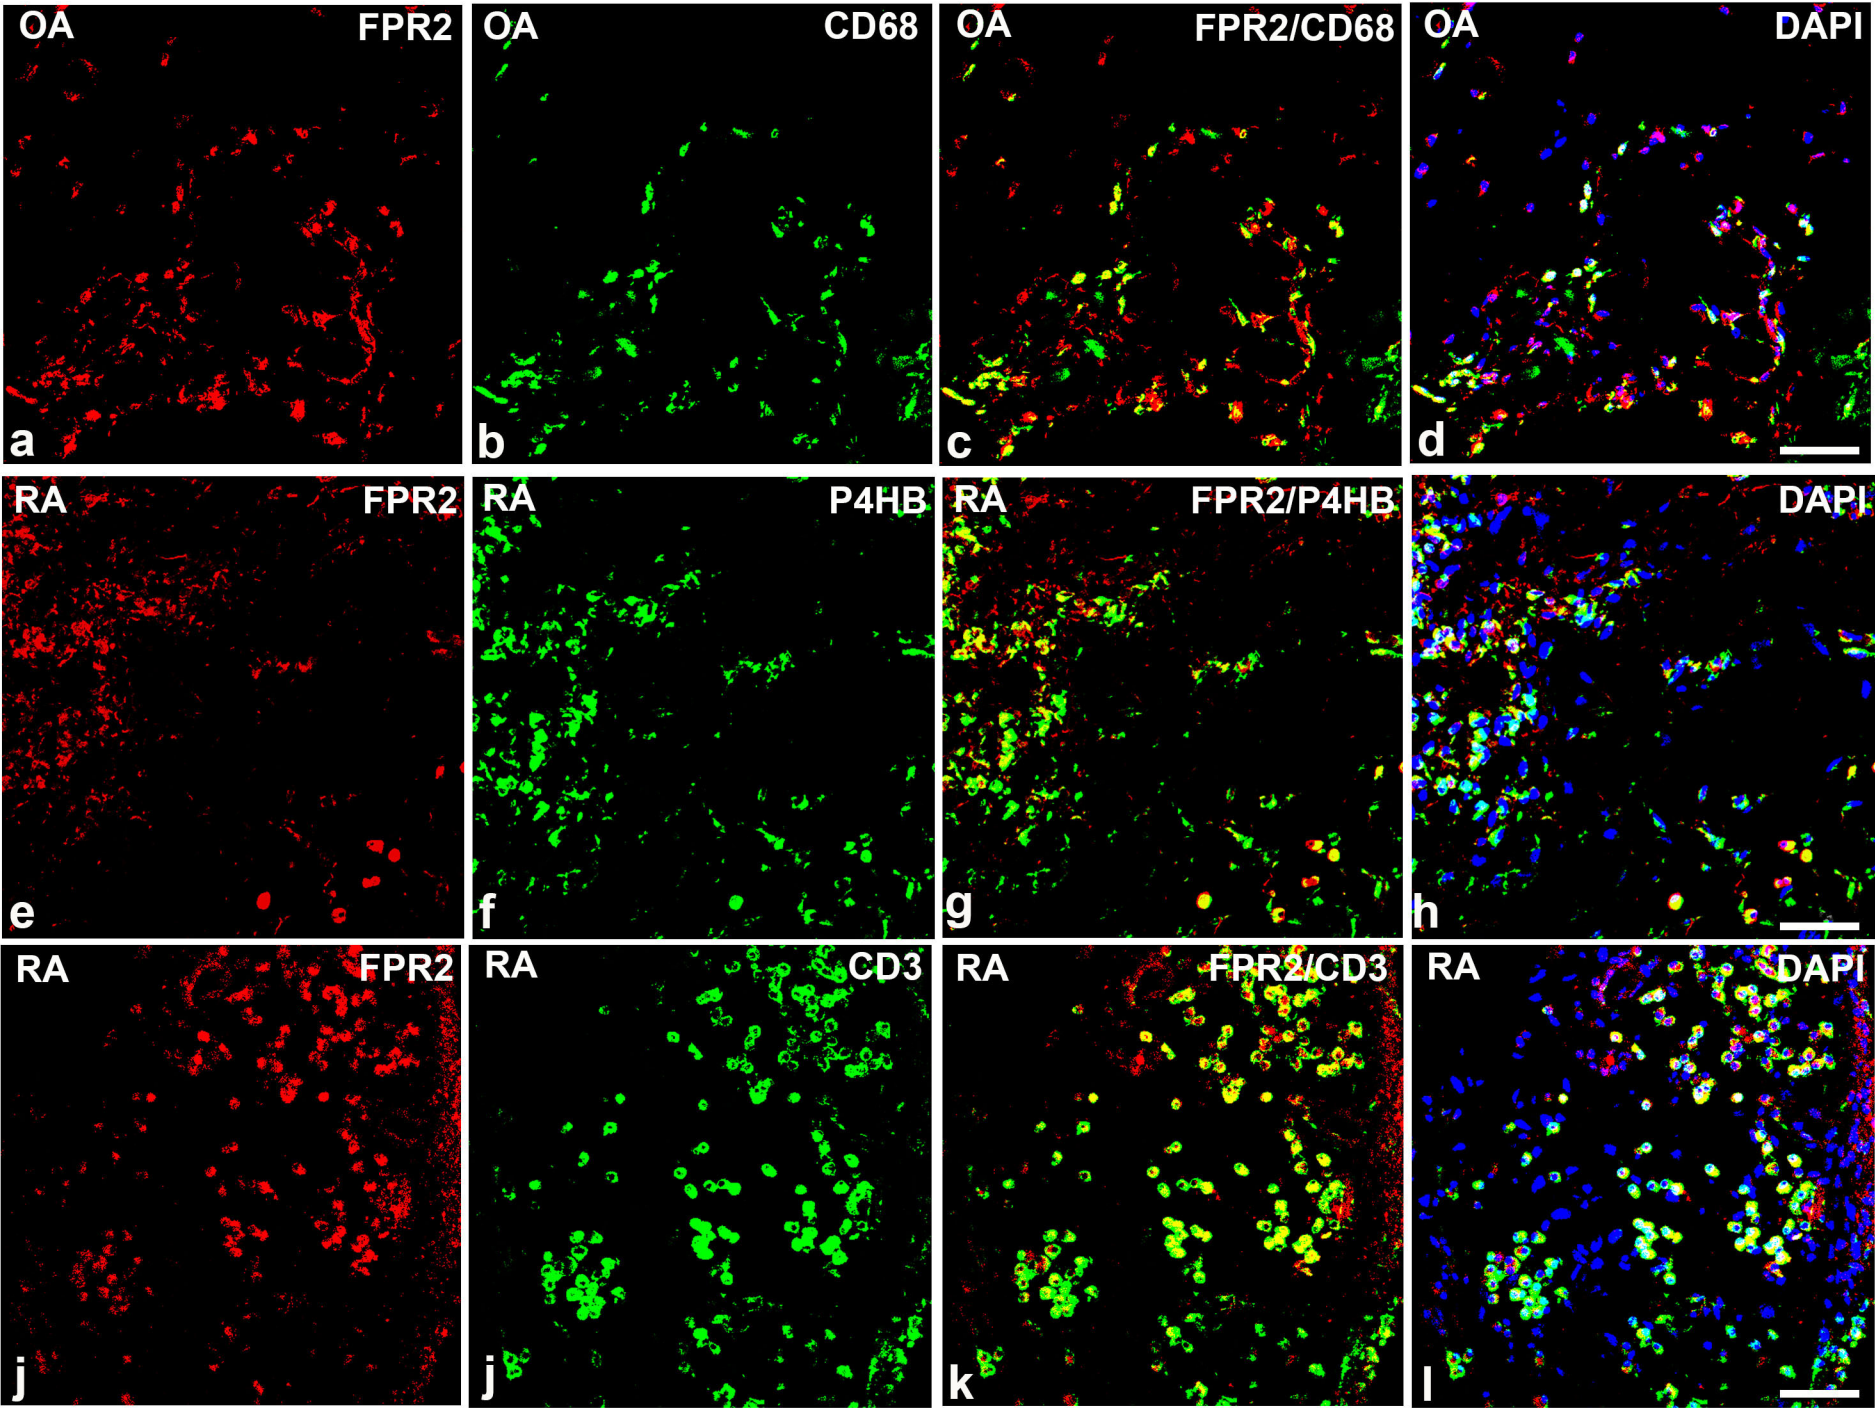

Supplement Figure 5

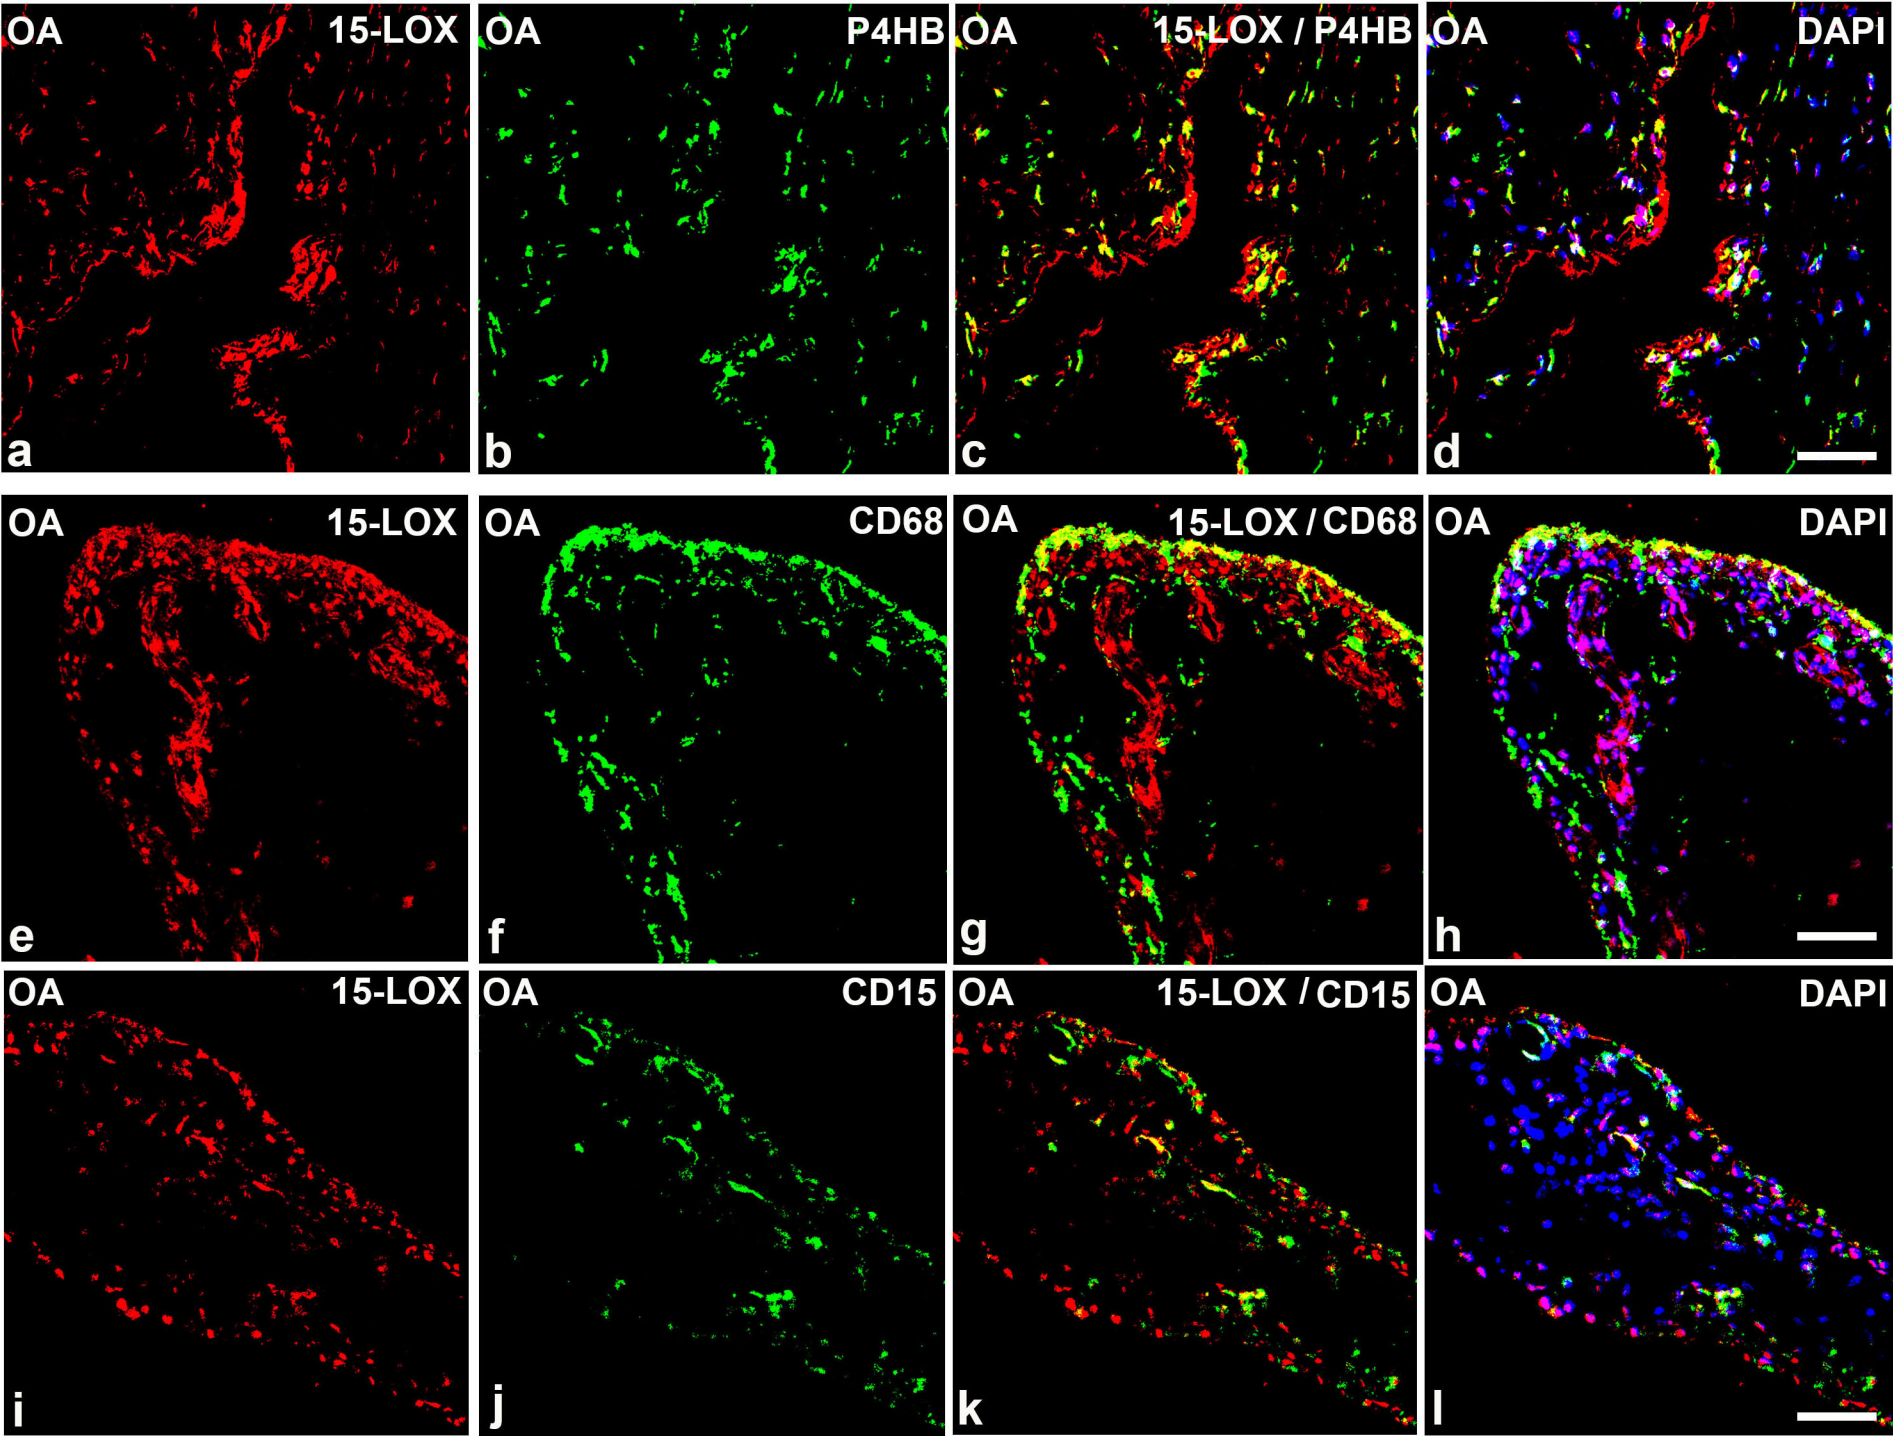



Supplement Figure 6

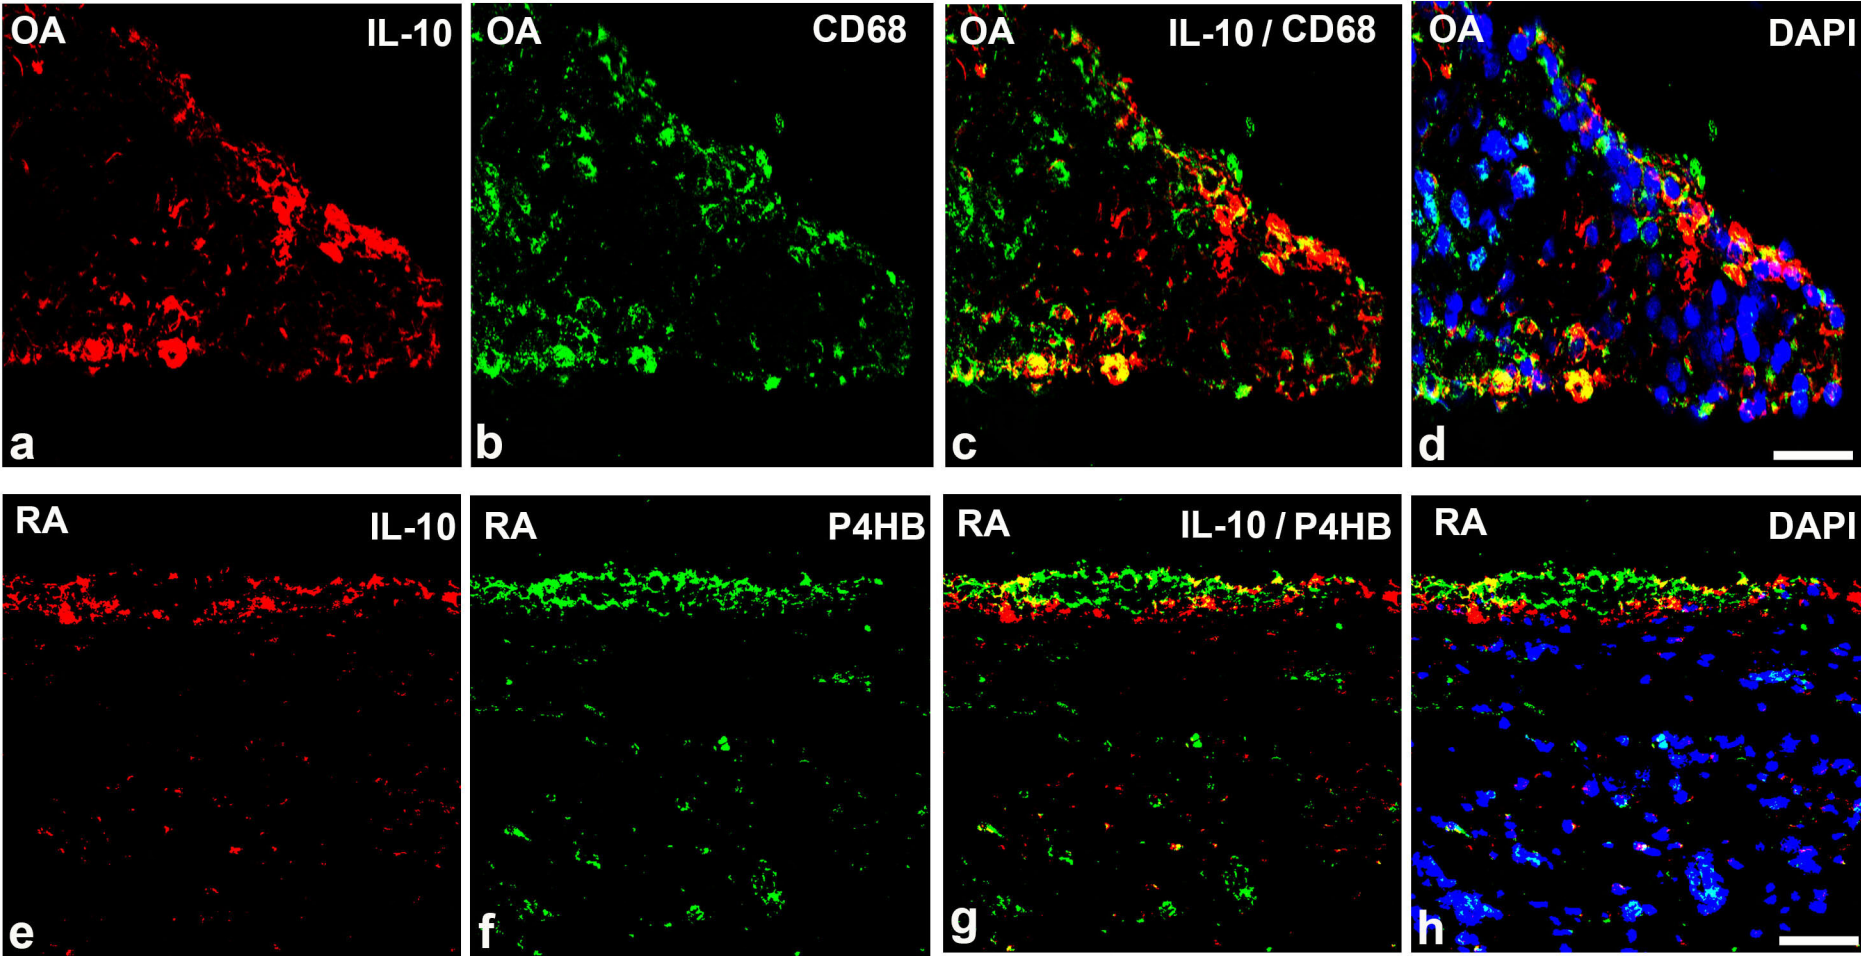

Supplement: f1 [file 9243736.f1.pdf]
